# Supplementary material for: Concurrent regulation of LKB1 and CaMKK2 in the activation of AMPK in castrate-resistant prostate cancer by a well-defined polyherbal mixture with anticancer properties
Source: PubMed Central journal article supplement (PMC6006779; doi:10.1186/s12906-018-2255-0), 2018-06-18
Supplement: 12906_2018_2255_MOESM2_ESM.pdf [file 12906_2018_2255_MOESM2_ESM.pdf]

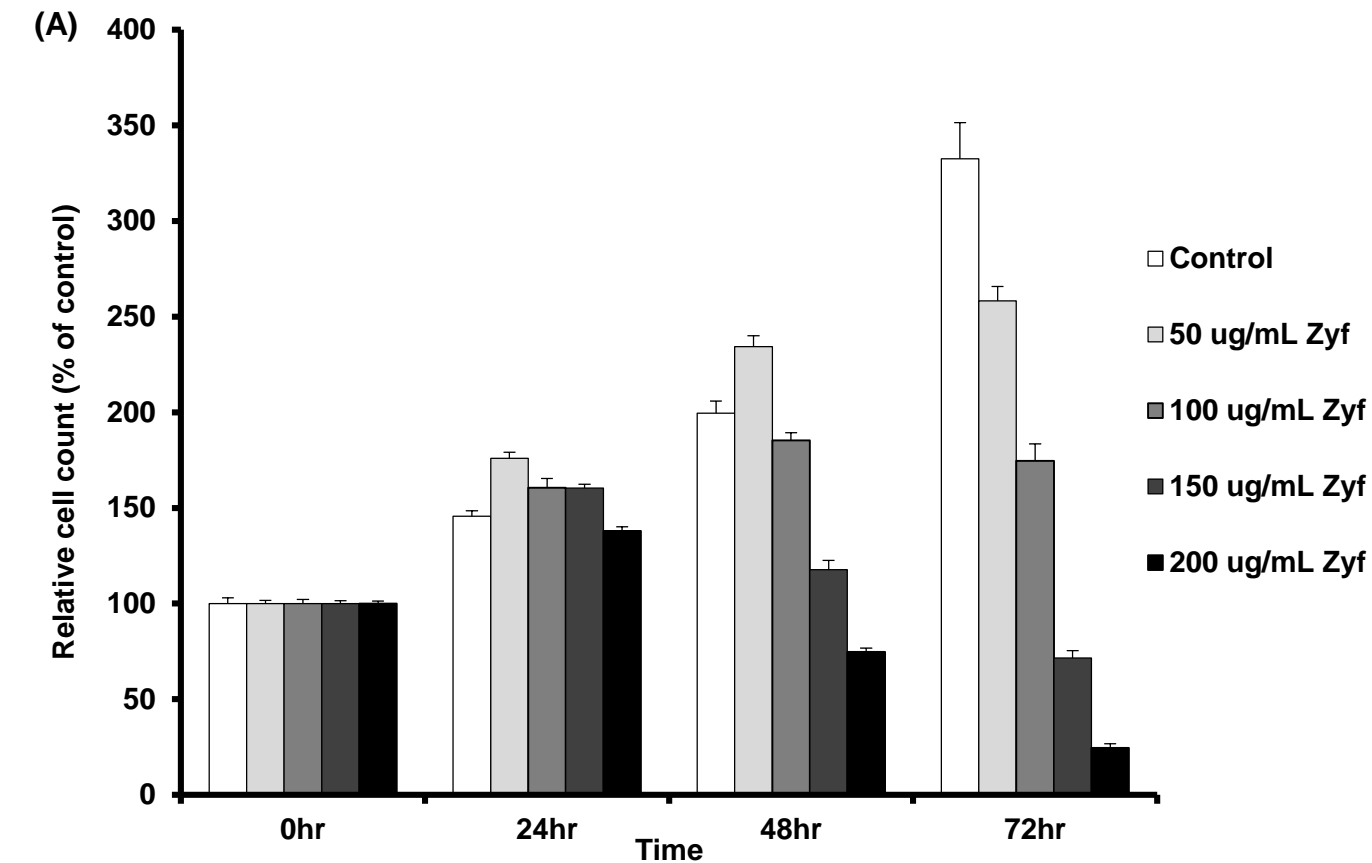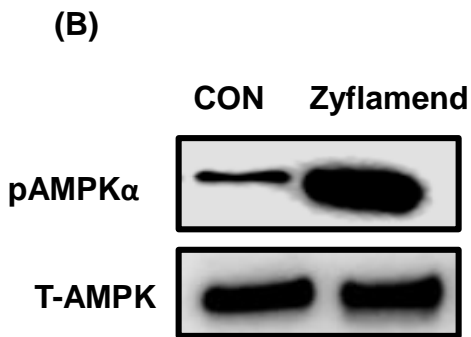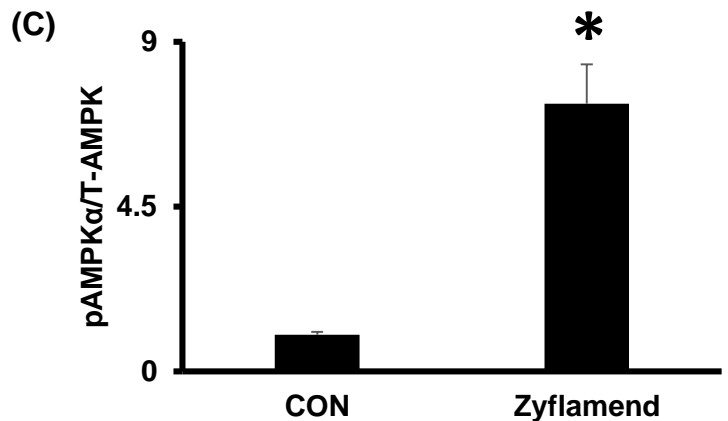

**Supplemental Figure 2.** The effects of Zyflamend on cell proliferation and phosphorylation of AMPK $\alpha$  (at Thr172) in HCT 116 cells. (A) MTT assay of HCT 116 cells in the presence or absence of Zyflamend (50-200  $\mu$ g/mL, 0 hr – 72 hr). (B, C) The effects of Zyflamend (200  $\mu$ g/mL, 3 hr) on phosphorylation of AMPK $\alpha$  in HCT 116 cells. Data is presented as mean  $\pm$  SEM, n=8 (A) and n=3 (C) and statistically significant at p<0.05. Abbreviations: Con, Control.
