# Supplementary material for: Concurrent regulation of LKB1 and CaMKK2 in the activation of AMPK in castrate-resistant prostate cancer by a well-defined polyherbal mixture with anticancer properties
Source: Springer Nature journal article supplement (doi:10.1186/s12906-018-2255-0), 2018-06-18
Supplement: MOESM1 [file 15854276]

## Zyflamend Dose Response

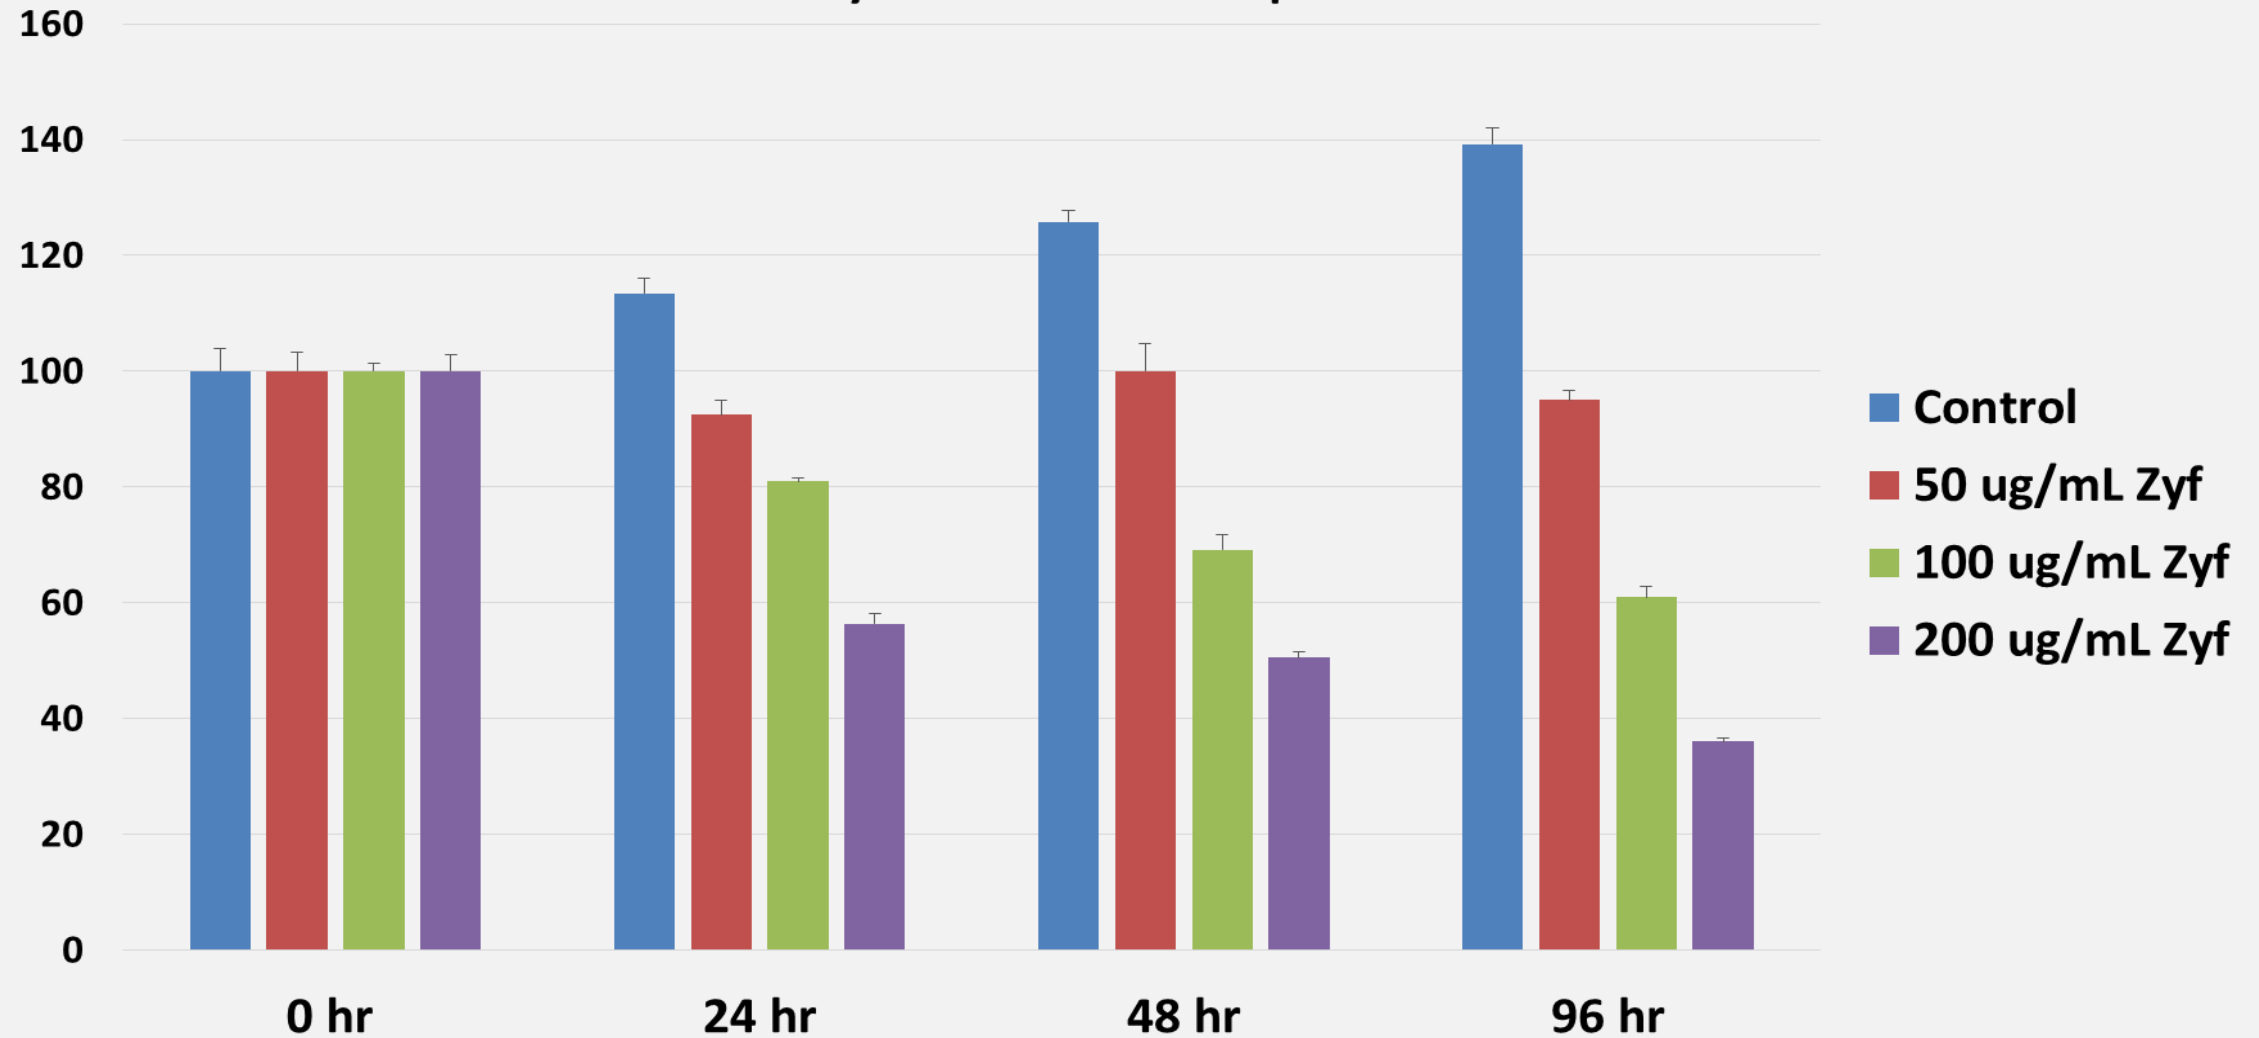

**Figure 1: Effect of Cell Proliferation ± Zyflamend in CWR22Rv1s.**

Graph of MTT assay ± Zyflamend (50 ug/mL, 100 ug/mL, 200 ug/mL, 0-96 hr). Error Bars are SEM; n=8.
